# Supplementary figures and images for: Dysgeusia in MASLD-related advanced chronic liver disease (ACLD): a silent driver towards the “Bermuda” triangle of malnutrition-sarcopenia-frailty severely affecting prognosis
Source: PubMed Central journal article supplement — Nutr J. 2025 Jan 16;24:10. doi: 10.1186/s12937-025-01074-z (PMC11736961; doi:10.1186/s12937-025-01074-z), 2025-01-16

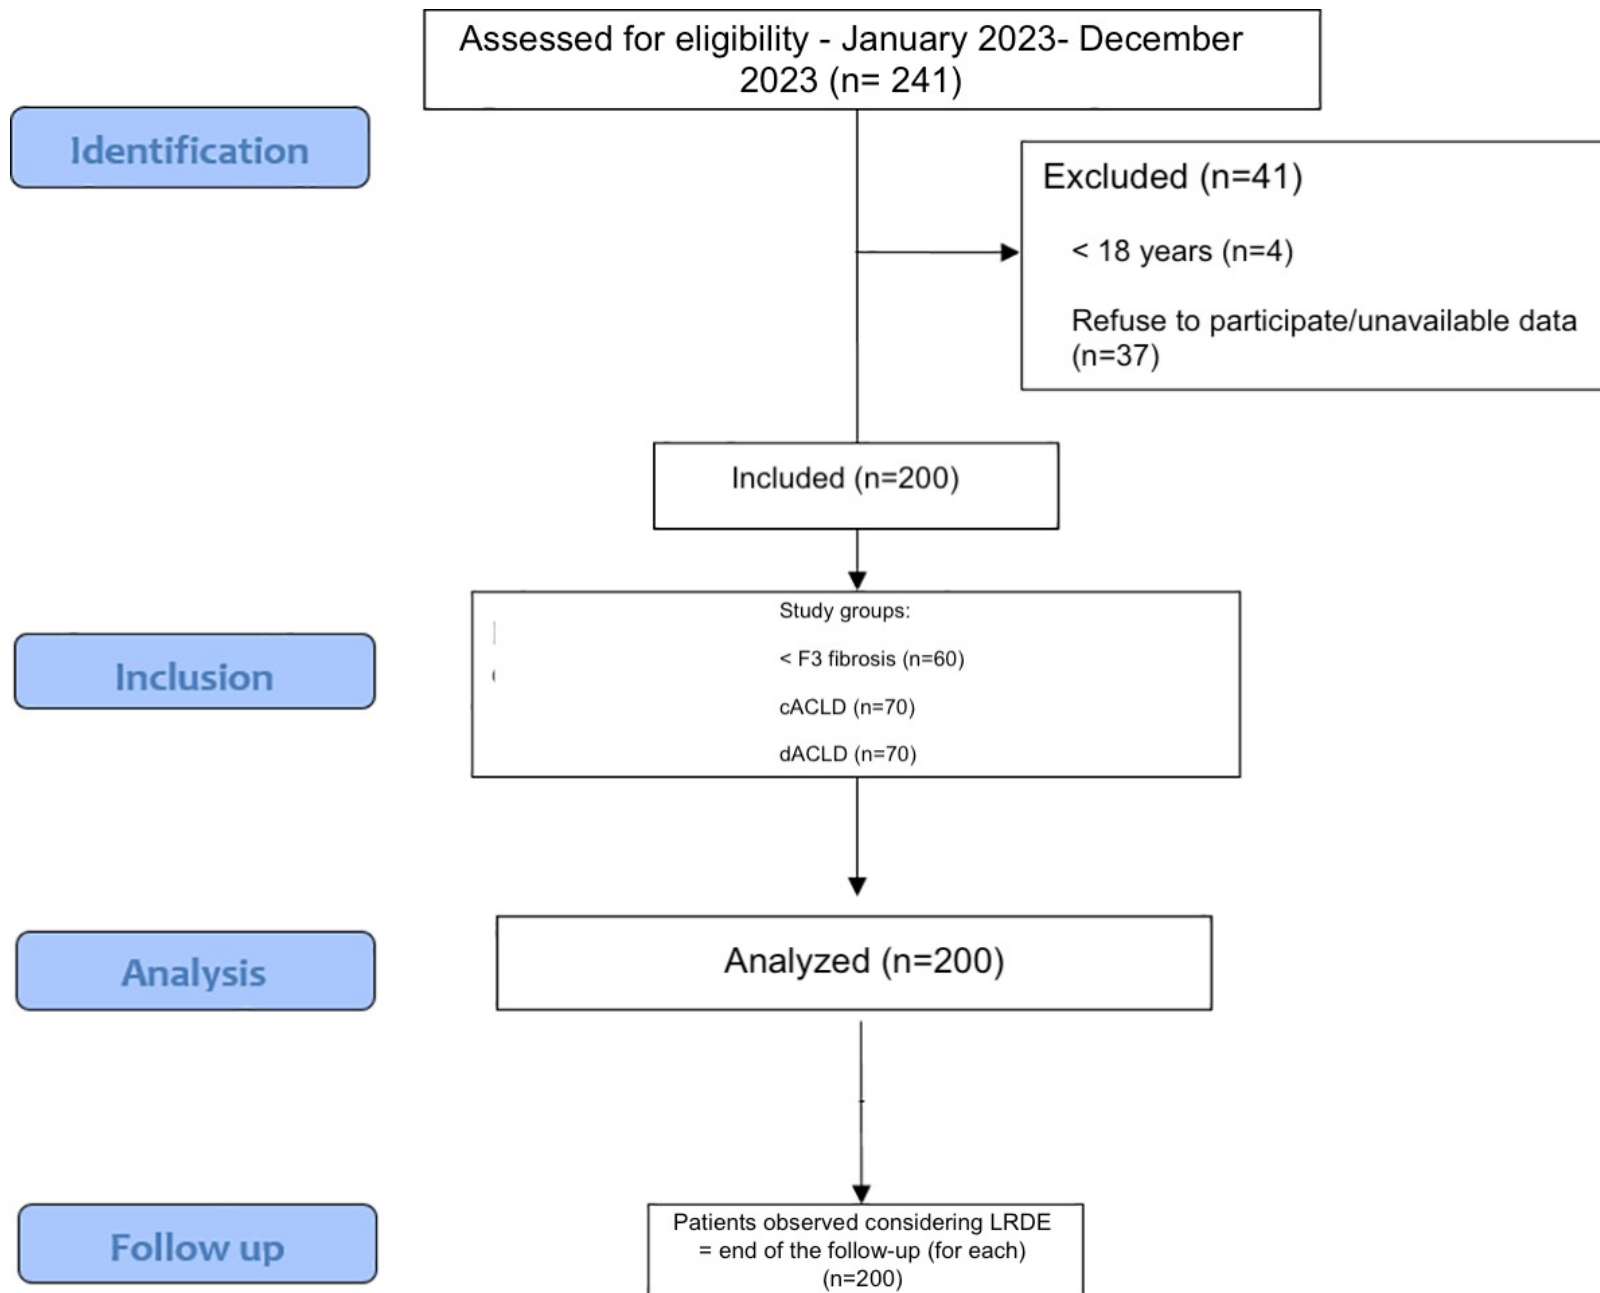

Supplement: 12937_2025_1074_MOESM5_ESM.pdf [file 12937_2025_1074_MOESM5_ESM.pdf]
